# Supplementary material for: Evaluation of Virulence in Cynomolgus Macaques Using a Virus Preparation Enriched for the Extracellular Form of Monkeypox Virus
Source: MDPI journal article supplement (doi:10.3390/v14091993), 2022-09-09
Supplement: s1 [file s1]

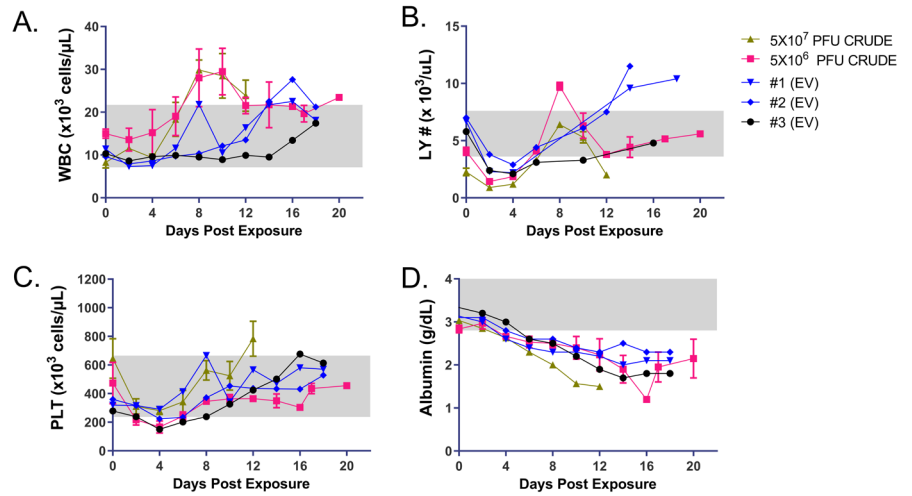

**Figure S1. Select hematology and albumin levels of animals exposed to an EEV enriched preparation of monkeypox virus.** Hematology using EDTA whole blood was performed on a Coulter AcT10. Chemistry was performed using a General Chemistry Panel on Piccolo analyzers. (A) White blood cells (WBC); (B) number of lymphocytes (LY #); (C) platelets (PLT); (D) albumin. Reference ranges (grey boxes) were provided by USAMRIID with the exception of WBC [32].
